# Supplementary material for: Broad-spectrum antiviral agents: secreted phospholipase A2 targets viral envelope lipid bilayers derived from the endoplasmic reticulum membrane
Source: PubMed Central journal article supplement (PMC5698466; doi:10.1038/s41598-017-16130-w), 2017-11-21
Supplement: 41598_2017_16130_MOESM1_ESM.pdf [file 41598_2017_16130_MOESM1_ESM.pdf]

## **Broad-spectrum antiviral agents: secreted phospholipase A<sub>2</sub> targets viral envelope lipid bilayers derived from the endoplasmic reticulum membrane**

Ming Chen<sup>1</sup>, Chie Aoki-Utsubo<sup>2</sup>, Masanori Kameoka<sup>2</sup>, Lin Deng<sup>3</sup>, Yutaka Terada<sup>4</sup>, Wataru Kamitani<sup>4</sup>, Kei Sato<sup>5,6</sup>, Yoshio Koyanagi<sup>5</sup>, Makoto Hijikata<sup>7</sup>, Keiko Shindo<sup>8</sup>, Takeshi Noda<sup>8</sup>, Michinori Kohara<sup>9</sup> & Hak Hotta<sup>1,\*</sup>

<sup>1</sup>Department of Vaccine and Drug Development, Graduate School of Health Sciences, Kobe University, Kobe 650-0047, Japan

<sup>2</sup>Department of International Health, Graduate School of Health Sciences, Kobe University, Kobe 654-0147, Japan

<sup>3</sup>Division of Infectious Disease Control, Graduate School of Medicine, Kobe University, Kobe 650-0017, Japan

<sup>4</sup>Laboratory of Clinical Research on Infectious Diseases, Research Institute for Microbial Diseases, Osaka University, Suita, Osaka 565-0871, Japan

<sup>5</sup>Laboratory of Systems Virology, Institute for Frontier Life and Medical Sciences, Kyoto University, Kyoto 606-8507, Japan

<sup>6</sup>CREST, Japan Science and Technology Agency, Saitama 322-0012, Japan

<sup>7</sup>Laboratory of Tumour Viruses, Institute for Frontier Life and Medical Sciences, Kyoto University, Kyoto 606-8507, Japan

<sup>8</sup>Laboratory of Ultrastructural Virology, Institute for Frontier Life and Medical Sciences, Kyoto University, Kyoto 606-8507, Japan

<sup>9</sup>Infectious Disease Regulation Project, Tokyo Metropolitan Institute of Medical Science, Tokyo 156-8506, Japan

\*Correspondence and request for materials should be addressed to H.H. (email: [hotta@kobe-u.ac.jp](mailto:hotta@kobe-u.ac.jp))

**Supplementary Table S1. Time-of-addition experiments using CM-II-sPLA<sub>2</sub> against HCV and DENV.**

| Virus | CM-II-sPLA <sub>2</sub><br>(ng/ml) | % Reduction of the number of virus-infected cells |                       |                      |
|-------|------------------------------------|---------------------------------------------------|-----------------------|----------------------|
|       |                                    | Pretreatment of cells                             | Pretreatment of virus | Post-entry treatment |
| HCV   | 1,000                              | 93 ± 1                                            | >99                   | <1                   |
|       | 100                                | 54 ± 3                                            | >99                   | <1                   |
|       | 10                                 | 16 ± 1                                            | >99                   | <1                   |
|       | 1                                  | 4 ± 1                                             | >99                   | <1                   |
| DENV  | 1,000                              | 96 ± 1                                            | >99                   | <1                   |
|       | 100                                | 83 ± 5                                            | >99                   | <1                   |
|       | 10                                 | 37 ± 3                                            | >99                   | <1                   |
|       | 1                                  | 2 ± 2                                             | >99                   | <1                   |

Data are presented as the average ± SEM (n = 2).

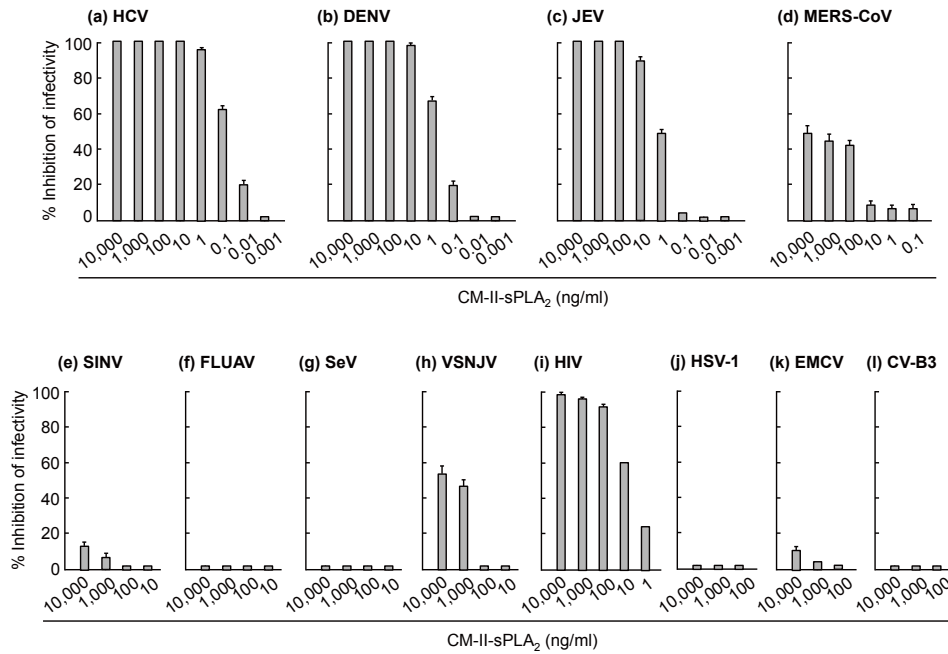

**Supplementary Figure S1.** Dose-dependent inhibition of a panel of viruses by CM-II-sPLA<sub>2</sub>. A fixed amount of test virus was mixed with serial dilutions of sPLA<sub>2</sub>s and incubated at 37°C for 1 h. The mixtures were inoculated onto the cells and incubated for another 1 h to allow virus adsorption. Then, the cells were washed with medium to remove the residual virus and cultured for 2 to 4 days (plaque assay and TCID<sub>50</sub> test), 24 h (FA test) or 2 days (TZM-bl assay) in fresh medium without sPLA<sub>2</sub>s. Viral solutions not treated with sPLA<sub>2</sub>s served as a control. The percent inhibition of viral infectivity by the sPLA<sub>2</sub>s compared to the untreated control was calculated. Data are presented as the average ± SEM (n = 3 to 5).

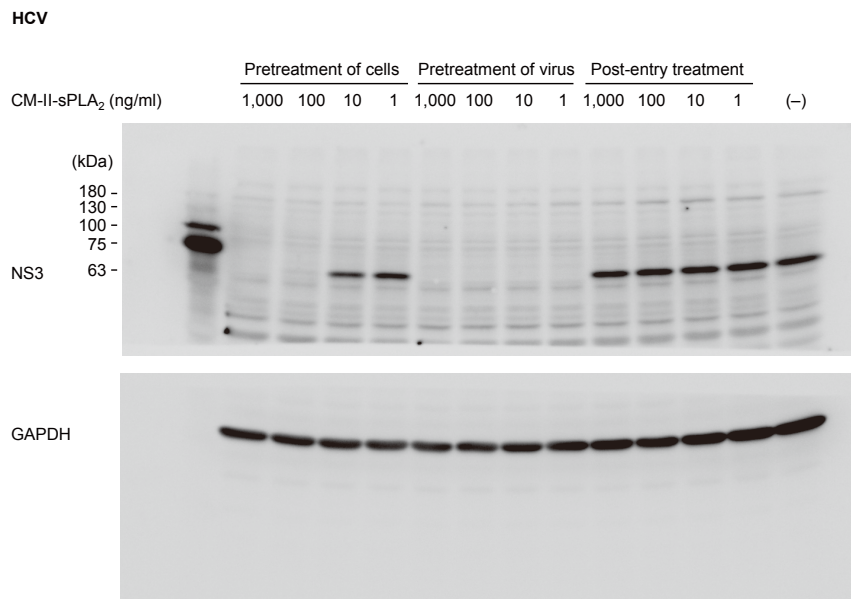

**Supplementary Figure S2. Time-of-addition experiments using CM-II-sPLA<sub>2</sub> against**

**HCV.** HCV NS3 expression levels were examined by immunoblotting analysis. (i) Pretreatment of the cells: Huh7it-1 cells were treated with various concentrations of CM-II-sPLA<sub>2</sub> (1,000, 100, 10 and 1 ng/ml) for 1 h. Then, the cells were inoculated with HCV in the absence of CM-II-sPLA<sub>2</sub> for another 1 h and cultured for 24 h in the absence of CM-II-sPLA<sub>2</sub>. (ii) Pretreatment of the virus: HCV was incubated with CM-II-sPLA<sub>2</sub> for 1 h, and the mixtures were inoculated to Huh7it-1 cells. After 1 h, the cells were cultured for 24 h in the absence of CM-II-sPLA<sub>2</sub>. (iii) Post-entry treatment: Huh7it-1 cells were inoculated with HCV in the absence of CM-II-sPLA<sub>2</sub>. After 1 h, the cells were cultured for 24 h in the presence of CM-II-sPLA<sub>2</sub>. (-), Untreated control. The lysates of the infected cells were subjected to 12% SDS-polyacrylamide gel electrophoresis and the full-length gel was electrophoretically blotted onto a polyvinylidene difluoride membrane. The membrane was cut into two pieces, which were probed with either anti-HCV NS3 (upper panel) or anti-GAPDH antibodies (lower panel). GAPDH bands serve as a loading control.

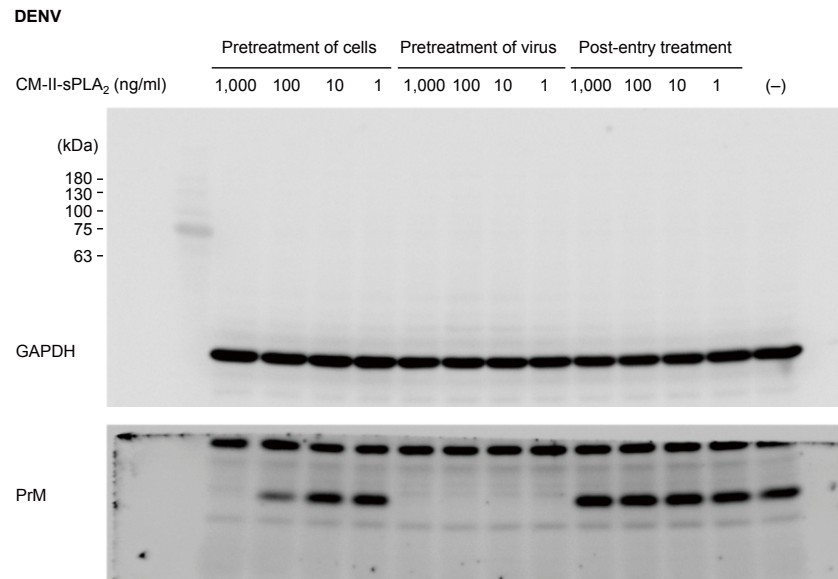

**Supplementary Figure S3. Time-of-addition experiments using CM-II-sPLA<sub>2</sub> against**

**DENV.** DENV PrM expression levels were examined by immunoblotting. (i) Pretreatment of the cells: Huh7it-1 cells were treated with various concentrations of CM-II-sPLA<sub>2</sub> (1,000, 100, 10 and 1 ng/ml) for 1 h. Then, the cells were inoculated with DENV in the absence of CM-II-sPLA<sub>2</sub> for another 1 h and cultured for 24 h in the absence of CM-II-sPLA<sub>2</sub>. (ii) Pretreatment of the virus: DENV was incubated with CM-II-sPLA<sub>2</sub> for 1 h, and the mixtures were inoculated onto Huh7it-1 cells. After 1 h, the cells were cultured for 24 h in the absence of CM-II-sPLA<sub>2</sub>. (iii) Post-entry treatment: Huh7it-1 cells were inoculated with DENV in the absence of CM-II-sPLA<sub>2</sub>. After 1 h, the cells were cultured for 24 h in the presence of CM-II-sPLA<sub>2</sub>. (-), Untreated control. The lysates of the infected cells were subjected to 12% SDS-polyacrylamide gel electrophoresis and the full-length gel was electrophoretically blotted onto a polyvinylidene difluoride membrane. The membrane was cut into two pieces, which were probed with either anti-GAPDH (upper panel) or anti-DENV PrM antibodies (lower panel). GAPDH bands serve as a loading control.
